# Supplementary material for: Eating Out and Consumers’ Health: Evidence on Obesity and Balanced Nutrition Intakes
Source: PubMed Central journal article supplement (PMC7014261; doi:10.3390/ijerph17020586), 2020-01-16

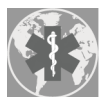

**Supplementary Material**

**Table S1.** Korean dietary reference intakes.

| Sex    | Age   | Energy            | Protein       | Fat         | Carbohydrate | Calcium        | Sodium         | Potassium      |
|--------|-------|-------------------|---------------|-------------|--------------|----------------|----------------|----------------|
|        |       | (EER)<br>kcal/day | (RI)<br>g/day | (AMDR)<br>% | (AMDR)<br>%  | (RI)<br>mg/day | (AI)<br>mg/day | (AI)<br>mg/day |
| Male   | 19-29 | 2,600             | 65            | 15-30       | 55-65        | 800            | 1500           | 3500           |
|        | 30-49 | 2,400             | 60            | 15-30       | 55-65        | 800            | 1500           | 3500           |
|        | 50-64 | 2,200             | 60            | 15-30       | 55-65        | 750            | 1500           | 3500           |
| Female | 19-29 | 2,100             | 55            | 15-30       | 55-65        | 700            | 1500           | 3500           |
|        | 30-49 | 1,900             | 50            | 15-30       | 55-65        | 700            | 1500           | 3500           |
|        | 50-64 | 1,800             | 50            | 15-30       | 55-65        | 800            | 1500           | 3500           |

Source: 2015 Korean Dietary Reference Intakes, Ministry of Health and Welfare

- Note: (1) EER: Estimated Energy Requirement  
 (2) RI: Recommended Intake  
 (3) AI: Adequate Intake  
 (4) AMDR: Acceptable Macronutrient Distribution Ranges

**Table S2.** Covariate balance summary for treated group 1.

| Covariates  | Standardized Differences |          | Variance Ratio |          |
|-------------|--------------------------|----------|----------------|----------|
|             | Raw                      | Weighted | Raw            | Weighted |
| male        | 0.1289                   | -0.0059  | 1.1678         | 0.9976   |
| age         | -0.5657                  | 0.0106   | 1.2477         | 0.9300   |
| urban       | 0.0515                   | 0.0768   | 1.0077         | 1.0137   |
| education   | 0.4580                   | 0.0486   | 1.4475         | 1.0239   |
| cfam        | 0.1581                   | -0.0852  | 0.8961         | 0.9997   |
| singlehh    | -0.0530                  | 0.0739   | 0.8134         | 1.3343   |
| ainc        | 0.3330                   | -0.1252  | 1.1525         | 0.6253   |
| married     | -0.2907                  | -0.0086  | 1.9666         | 1.0112   |
| child       | 0.2157                   | 0.0061   | 1.1009         | 1.0025   |
| fulltime    | 0.1547                   | 0.0712   | 1.6616         | 1.1248   |
| temporary   | 0.0349                   | -0.0103  | 1.0517         | 0.9879   |
| pedu_uni    | 0.2542                   | -0.0459  | 1.9322         | 0.9178   |
| medu_uni    | 0.2353                   | -0.0553  | 3.4635         | 0.8339   |
| healthy     | 0.2575                   | -0.0807  | 1.2673         | 0.9531   |
| activitylim | -0.2184                  | -0.0120  | 0.4926         | 0.9563   |
| body        | -0.0082                  | -0.0139  | 0.9988         | 0.9975   |
| drinking    | 0.1315                   | 0.0487   | 1.2783         | 1.0752   |
| stress      | 0.0061                   | 0.0652   | 1.0072         | 1.0757   |

|           |         |         |        |        |
|-----------|---------|---------|--------|--------|
| highBP    | -0.2434 | 0.0009  | 0.7174 | 1.0015 |
| prehyper  | -0.0634 | -0.0275 | 0.9220 | 0.9680 |
| labeluse  | 0.1242  | -0.0171 | 1.1032 | 0.9857 |
| mealdaily | -0.1927 | -0.0116 | 1.1116 | 1.0227 |
| year13    | 0.0111  | -0.0067 | 1.0061 | 0.9959 |
| year14    | -0.0567 | 0.0469  | 0.9590 | 1.0377 |

**Table S3.** Covariate balance summary for treated group 2.

| Covariates  | Standardized Differences |          | Variance Ratio |          |
|-------------|--------------------------|----------|----------------|----------|
|             | Raw                      | Weighted | Raw            | Weighted |
| male        | 0.7921                   | 0.0038   | 1.4467         | 1.0015   |
| age         | -0.7996                  | -0.0034  | 1.1681         | 0.8644   |
| urban       | 0.0805                   | 0.1099   | 1.0099         | 1.0159   |
| education   | 0.5972                   | 0.0592   | 1.4823         | 1.0285   |
| cfam        | 0.1979                   | -0.0835  | 0.9438         | 1.0136   |
| singlehh    | -0.0077                  | 0.0683   | 0.9721         | 1.3075   |
| ainc        | 0.4739                   | -0.1140  | 1.2401         | 0.6035   |
| married     | -0.5169                  | 0.0071   | 2.6696         | 0.9908   |
| child       | 0.2206                   | -0.0207  | 1.1022         | 0.9911   |
| fulltime    | 0.8136                   | 0.0789   | 4.4112         | 1.1381   |
| temporary   | 0.2404                   | 0.0150   | 1.3226         | 1.0173   |
| pedu_uni    | 0.3179                   | -0.0409  | 2.1762         | 0.9268   |
| medu_uni    | 0.3035                   | -0.0389  | 4.4315         | 0.8822   |
| healthy     | 0.3178                   | -0.0663  | 1.3102         | 0.9621   |
| activitylim | -0.3106                  | -0.0057  | 0.3087         | 0.9796   |
| body        | -0.0510                  | -0.0080  | 0.9916         | 0.9988   |
| drinking    | 0.3181                   | 0.0510   | 1.6435         | 1.0780   |
| stress      | 0.1005                   | 0.0391   | 1.1160         | 1.0462   |
| highBP      | -0.1956                  | 0.0096   | 0.7766         | 1.0151   |
| prehyper    | 0.0000                   | -0.0344  | 0.9999         | 0.9598   |
| labeluse    | -0.0168                  | -0.0449  | 0.9838         | 0.9622   |
| mealdaily   | -0.1485                  | -0.0416  | 1.0207         | 0.9083   |
| year13      | -0.0023                  | 0.0053   | 0.9985         | 1.0033   |
| year14      | -0.0528                  | 0.0046   | 0.9621         | 1.0038   |

**Table S4.** balance summary for treated group 3.

| Covariates  | Standardized Differences |          | Variance Ratio |          |
|-------------|--------------------------|----------|----------------|----------|
|             | Raw                      | Weighted | Raw            | Weighted |
| male        | 1.0653                   | -0.0283  | 1.2836         | 0.9883   |
| age         | -0.9981                  | 0.1869   | 1.2097         | 0.9766   |
| urban       | 0.0931                   | 0.0246   | 1.0117         | 1.0056   |
| education   | 0.5978                   | -0.0266  | 1.4844         | 0.9849   |
| cfam        | 0.0753                   | -0.0224  | 1.0756         | 1.1644   |
| singlehh    | 0.1703                   | 0.0013   | 1.6808         | 1.0055   |
| ainc        | 0.4409                   | -0.1958  | 1.1357         | 0.5049   |
| married     | -0.8365                  | 0.0279   | 3.2817         | 0.9640   |
| child       | 0.0786                   | -0.0479  | 1.0490         | 0.9775   |
| fulltime    | 0.8606                   | 0.0380   | 4.5196         | 1.0670   |
| temporary   | 0.0603                   | 0.0173   | 1.0903         | 1.0199   |
| pedu_uni    | 0.3973                   | -0.0515  | 2.4769         | 0.9078   |
| medu_uni    | 0.3345                   | -0.0939  | 4.9091         | 0.7237   |
| healthy     | 0.2503                   | -0.0475  | 1.2636         | 0.9736   |
| activitylim | -0.2412                  | -0.0834  | 0.4459         | 0.7152   |
| body        | -0.0084                  | 0.0580   | 1.0002         | 1.0054   |
| drinking    | 0.4988                   | 0.0265   | 1.9204         | 1.0408   |
| stress      | 0.1875                   | 0.1337   | 1.2044         | 1.1479   |
| highBP      | -0.3240                  | 0.0960   | 0.6167         | 1.1473   |
| prehyper    | 0.1185                   | 0.0734   | 1.1321         | 1.0801   |
| labeluse    | -0.0317                  | -0.0840  | 0.9707         | 0.9266   |
| mealdaily   | -0.1771                  | 0.0040   | 1.1033         | 0.9546   |
| year13      | -0.0582                  | 0.0768   | 0.9640         | 1.0422   |
| year14      | -0.0280                  | 0.0533   | 0.9817         | 1.0413   |

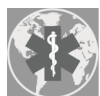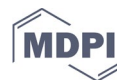

**Table S5.** Mean estimation of outcome variables over FAFH.

| FAFH | Percentage deviation of energy | Percentage deviation of protein | Percentage deviation of fat | Percentage deviation of carbohydrate | Percentage deviation of calcium | Percentage deviation of sodium | Percentage deviation of potassium | Energy deviation     | BMI                  | obesity             |
|------|--------------------------------|---------------------------------|-----------------------------|--------------------------------------|---------------------------------|--------------------------------|-----------------------------------|----------------------|----------------------|---------------------|
| 0    | 0.257***<br>(0.006)            | 0.326***<br>(0.007)             | 0.437***<br>(0.007)         | 0.294***<br>(0.006)                  | 0.471***<br>(0.006)             | 0.899***<br>(0.021)            | 0.365***<br>(0.006)               | -0.117***<br>(0.007) | 23.93***<br>(0.086)  | 0.332***<br>(0.011) |
| 1    | 0.269***<br>(0.004)            | 0.426***<br>(0.008)             | 0.401***<br>(0.006)         | 0.314***<br>(0.005)                  | 0.403***<br>(0.004)             | 1.252***<br>(0.019)            | 0.327***<br>(0.004)               | -0.009<br>(0.006)    | 23.49***<br>(0.066)  | 0.289***<br>(0.008) |
| 2    | 0.264***<br>(0.005)            | 0.438***<br>(0.010)             | 0.398***<br>(0.007)         | 0.287***<br>(0.006)                  | 0.400***<br>(0.005)             | 1.459***<br>(0.025)            | 0.329***<br>(0.005)               | 0.010<br>(0.007)     | 23.62***<br>(0.0724) | 0.311***<br>(0.010) |
| 3    | 0.279***<br>(0.011)            | 0.485***<br>(0.021)             | 0.411***<br>(0.015)         | 0.277***<br>(0.011)                  | 0.384***<br>(0.009)             | 1.653***<br>(0.055)            | 0.323***<br>(0.010)               | 0.046***<br>(0.016)  | 24.14***<br>(0.155)  | 0.364***<br>(0.021) |

Note: Standard errors in parentheses. \*\*\*, \*\*, and \* indicate coefficients are significant at the 0.01, 0.05 and 0.1 levels, respectively.

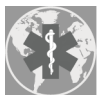

Supplement: ijerph-17-00586-s001.pdf [file ijerph-17-00586-s001.pdf]
